# Supplementary material
Source: Springer Nature journal article supplement (https://www.springermedizin.de/resource/supplementary/12889_2013_6360_MOESM4_ESM.docx/9497720)
Supplement: MOESM4 [file 9497720]

## Table 3. Associations between routine use of modern contraceptives method and related factors: Multivariate logistic regression showing adjusted odds ratio’s (AOR) and 95% confidence intervals [95% CI]

| Variables | Using modern contraceptives every time | | | p value | Adjusted odds ratio | |
| --- | --- | --- | --- | --- | --- | --- |
| Total (n=238) [%] | Yes (n=179) [75.2%] | No (n=59) [24.8%] | Model 1: women status | Model 2: All variables |
| Socioeconomic variables |  |  |  |  |  |  |
| Age (median: 37 years) |  |  |  |  |  |  |
| <37 | 138[58.0] | 103[74.6] | 35[25.4] | 0.810 | ― | ― |
| ≥37 | 100[42.0] | 76[76.0] | 24[24.0] |  |
| Education |  |  |  |  |  |  |
| Less than primary | 189[80.1] | 140[74.5] | 49[25.9] | 0.510 | ― | ― |
| Secondary or Higher | 47[19.9] | 37[78.7] | 10[21.3] |  |
| Duration of ART (months) |  |  |  |  |  |  |
| <32 | 48.5 | 86[75.4] | 28[24.6] | 0.878 | ― | ― |
| ≥32 | 51.5 | 85[74.6] | 29[25.4] |  |
| Having a son |  |  |  |  |  |  |
| No | 70[29.4] | 46[65.7] | 24[34.3] | 0.029 | 1.0 | 1.0 |
| Yes | 168[70.6] | 133[78.7] | 35[21.3] |  | 2.0**[1.1-3.9] | 2.2[0.9-5.9] |
| Having a daughter |  |  |  |  |  |  |
| No | 89[37.4] | 63[70.8] | 26[29.2] | 0.222 | ― | ― |
| Yes | 149[62.3] | 116[77.9] | 33[22.1] |  |
| Pregnancy experience after HIV diagnosis |  |  |  |  |  |  |
| No | 124[52.1] | 100[80.6] | 24[19.4] | 0.043 | 1.0 | 1.0 |
| Yes | 114[47.9] | 79[69.3] | 35[30.7] |  | 0.6[0.3-1.1] | 1.2[0.4-3.8] |
| Awareness of MTCT |  |  |  |  |  |  |
| Correct | 215[90.3] | 169[78.6] | 46[21.4] | <0.001 | 4.7** [1.9-11.6] | 2.1[0.5-9.9] |
| Incorrect | 23[9.7] | 10[43.5] | 13[56.5] |  | 1.0 | 1.0 |
| Partner-related variables |  |  |  |  |  |  |
| Living with a partner in same house |  |  |  |  |  |  |
| Yes | 211[88.7] | 166[78.7] | 45[21.3] | 0.001 | ― | 8.1[0.6-113.9] |
| No | 27[11.3] | 13[48.1] | 14[51.9] |  | 1.0 |
| Disclosed HIV status to a partner |  |  |  |  |  |  |
| Yes | 207[87.0] | 166[80.2] | 41[19.8] | <0.001 | ― | 2.0[0.3-13.9] |
| No | 31[13.0] | 13[43.3] | 18[58.1] |  | 1.0 |
| Partner's HIV status |  |  |  |  |  |  |
| Negative | 52[24.1] | 36[69.2] | 16[30.8] | 0.032 | ― | 1.0 |
| Positive | 159[73.6] | 132[83.0] | 27[17.0] |  | 0.8[0.3-2.4] |
| Family planning-related variables |  |  |  |  |  |  |
| Obtaining family planning information from health facility |  |  |  |  |  |  |
| No | 27[11.3] | 15[55.6] | 12[44.4] | 0.012 | 1.0 | 1.0 |
| Yes | 211[88.7] | 164[77.7] | 47[22.3] |  | 2.6*[1.1-6.2] | 2.1[0.6-7.7] |
| Being able to ask partner to use condom at each sexual intercourse | |  |  |  |  |  |
| Possible | 151[63.4] | 146[96.7] | 5[3.3] | <0.001 | ― | 23.7***[5.8-97.6] |
| Impossible | 84[35.3] | 33[39.8] | 51[60.7] |  | 1.0 |
| Being able to refuse a sexual intercourse with a partner |  |  |  |  |  |  |
| Possible | 160[67.2] | 143[89.4] | 17[10.6] | <0.001 | ― | 2.1[0.7-6.5] |
| Impossible | 69[29.0] | 33[47.8] | 36[52.2] |  |  | 1.0 |
| Person in last sexual intercourse was a husband |  |  |  |  |  |  |
| Yes | 203[85.3] | 162[79.8] | 41[20.2] | 0.001 | ― | 3.2[0.7-15.1] |
| No | 31[13.0] | 16[51.6] | 15[48.4] |  |  | 1.0 |

MTCT: mother to child transmission of HIV.
